# Supplementary material
Source: PubMed Central journal article supplement (PMC8642082)
Supplement: JSLHR-64-3477-s001.pdf [file JSLHR-64-3477-s001.pdf]

**Supplemental Material S1.** DSM-5 diagnostic criteria aligned with social (pragmatic) communication domains and sample PRS-SA items.

| <b>DSM-5 Diagnosis</b>                                                                                              | <b>DSM-5 Diagnostic criteria</b>                                                                                                                                                                         | <b>Social (pragmatic) Communication Domain</b>               | <b>Sample PRS-SA item</b>                                                                            |
|---------------------------------------------------------------------------------------------------------------------|----------------------------------------------------------------------------------------------------------------------------------------------------------------------------------------------------------|--------------------------------------------------------------|------------------------------------------------------------------------------------------------------|
| SCD                                                                                                                 | A1. Deficits in use of communication for social purposes (e.g., greeting and sharing information), in a manner that is appropriate for social context.                                                   | Speech Acts, Presupposition                                  | Social commenting appropriate for the social context                                                 |
|                                                                                                                     | A2. Impairment in the ability to change communication to match context or needs of the listener (e.g., speaking differently in a classroom than on a playground, avoiding use of overly formal language) | Presupposition                                               | Providing appropriate amount of information given the needs of the communicative partner and context |
|                                                                                                                     | A3. Difficulties following rules for conversation and storytelling (e.g., taking turns in conversation, rephrasing when misunderstood, and use of verbal and nonverbal signals to regulate interaction.  | Discourse management                                         | Appropriate conversational turn length; Appropriateness of clarifications; Use of gestures           |
|                                                                                                                     | A4. Difficulties understanding what is not explicitly stated (e.g., making inferences) and nonliteral or ambiguous language (e.g., idioms, humor, metaphors, etc.).                                      | Presupposition; Figurative language; Nonverbal communication | Expression and understanding of humor                                                                |
| ASD                                                                                                                 | A1. Abnormal social approach, conversation reciprocity, and reduced sharing of interests                                                                                                                 | Presupposition, Discourse management, Speech acts            |                                                                                                      |
|                                                                                                                     | A2. Deficits in nonverbal communication behaviors                                                                                                                                                        | Non-verbal communication                                     |                                                                                                      |
|                                                                                                                     | A3. Adjusting behavior to suit various social contexts                                                                                                                                                   | Presupposition                                               |                                                                                                      |
|                                                                                                                     | B1. Echolalia and idiosyncratic phrases                                                                                                                                                                  | Speech acts                                                  |                                                                                                      |
| B2. Insistence on sameness such as greeting rituals                                                                 |                                                                                                                                                                                                          | Speech acts, Presupposition                                  |                                                                                                      |
|                                                                                                                     | B3. Restricted interests or focus                                                                                                                                                                        | Presupposition, Discourse management                         |                                                                                                      |
| B4. Sensory reactivity that may lead to personal space violations (e.g., touching the communicative partner's hair) |                                                                                                                                                                                                          | Non-verbal communication                                     |                                                                                                      |

Derived from the DSM-5 (American Psychiatric Association, 2013)
