# Supplementary material
Source: PubMed Central journal article supplement (PMC8642082)
Supplement: JSLHR-64-3477-s002.pdf [file JSLHR-64-3477-s002.pdf]

**Supplemental Material S2.** Psychometric performance of scored items on the Pragmatic Rating Scale–School-Age (PRS-SA).

| <b>Item</b>            | <b><i>M</i></b> | <b><i>SD</i></b> | <b>Item-Rest<br/>Correlation</b> | <b>Item<br/>Alpha</b> |
|------------------------|-----------------|------------------|----------------------------------|-----------------------|
| Social Appropriateness | 2.1             | 1.4              | 0.50                             | 0.94                  |
| Conversational Turns   | 2.8             | 1.7              | 0.51                             | 0.94                  |
| Conveying Message      | 3.5             | 1.6              | 0.65                             | 0.94                  |
| Overly Detailed        | 2.8             | 1.6              | 0.41                             | 0.94                  |
| Reciprocal Engagement  | 3.4             | 1.5              | 0.71                             | 0.93                  |
| Expressing Humor       | 2.9             | 1.6              | 0.73                             | 0.93                  |
| Clarify Information    | 3               | 1.4              | 0.74                             | 0.93                  |
| Initiate Topics        | 3.2             | 1.5              | 0.54                             | 0.94                  |
| Maintain Topics        | 3.5             | 1.5              | 0.69                             | 0.93                  |
| Elaborate Topics       | 3.4             | 1.5              | 0.69                             | 0.93                  |
| Conversational Range   | 2.7             | 1.6              | 0.62                             | 0.94                  |
| Stereotypic Language   | 3.3             | 1.6              | 0.69                             | 0.93                  |
| Rate of Speech         | 3.2             | 1.6              | 0.76                             | 0.93                  |
| Intonation             | 3.4             | 1.7              | 0.73                             | 0.93                  |
| Loudness Regulation    | 3.1             | 1.5              | 0.49                             | 0.94                  |
| Idea Formulation       | 3.9             | 1.5              | 0.67                             | 0.94                  |
| Grammatical errors     | 3.5             | 1.6              | 0.51                             | 0.94                  |
| Personal Space         | 3.1             | 1.6              | 0.59                             | 0.94                  |
| Gesture Use            | 2.9             | 1.5              | 0.58                             | 0.94                  |
| Facial Expressions     | 3.7             | 1.4              | 0.69                             | 0.93                  |
| Eye Contact            | 3.8             | 1.5              | 0.66                             | 0.94                  |
| Talks to Self          | 2.2             | 1.6              | 0.54                             | 0.94                  |
| Hygiene Acts           | 1.7             | 1.3              | 0.37                             | 0.94                  |
